# Supplementary material for: Azobioisosteres of Curcumin with Pronounced Activity against Amyloid Aggregation, Intracellular Oxidative Stress, and Neuroinflammation
Source: PubMed Central journal article supplement — Chemistry. 2021 Mar 5;27(19):6015–27. doi: 10.1002/chem.202005263 (PMC8048673; doi:10.1002/chem.202005263), 2021-03-05
Supplement: CHEM-27-6015-s001.pdf [file CHEM-27-6015-s001.pdf]

# Chemistry–A European Journal

Supporting Information

## **Azobioisosteres of Curcumin with Pronounced Activity against Amyloid Aggregation, Intracellular Oxidative Stress, and Neuroinflammation**

Julian Hofmann,<sup>[a]</sup> Tiziana Ginex,<sup>[b]</sup> Alba Espargaró,<sup>[c]</sup> Matthias Scheiner,<sup>[a]</sup> Sandra Gunesch,<sup>[a]</sup> Marc Aragó,<sup>[b]</sup> Christian Stigloher,<sup>[d]</sup> Raimon Sabaté,<sup>[c]</sup> F. Javier Luque,<sup>\*[b]</sup> and Michael Decker<sup>\*[a]</sup>

# Supporting Information

## Table of contents

|                                                  |    |
|--------------------------------------------------|----|
| 1. Parametrization of the C-C-N-N dihedral angle | 3  |
| 2. HPLC-Chromatograms for purity control         | 8  |
| 3. Transmission Electron Microscopy              | 12 |
| 4. Anti-Inflammatory Effect on BV-2 cells        | 14 |

## 1. Parametrization of the C-C-N-N dihedral angle

The capability of the general Amber force field (GAFF) to properly describe the chemistry of the azobioisosteres investigated in this study was evaluated through preliminary MD simulations (data not shown). Accordingly, since no energy barrier was observed for the  $Ca=Car-N=N$  torsional, a proper parametrization of this torsional was carried out prior to proceed to MD simulations with A $\beta$ 42. MM parameters were generated by fitting the MM potential energy of the  $Ca=Car-N=N$  torsional on the QM-derived potential energy profile for the same torsional, derived from a relaxed scan performed at the M062X/6-31G(d) level in vacuo (see **Table S1**).

**Table S1.** Energy profiles for the selected torsion in azobenzenes determined by fitting quantum mechanical data. All energy values are in kcal/mol.

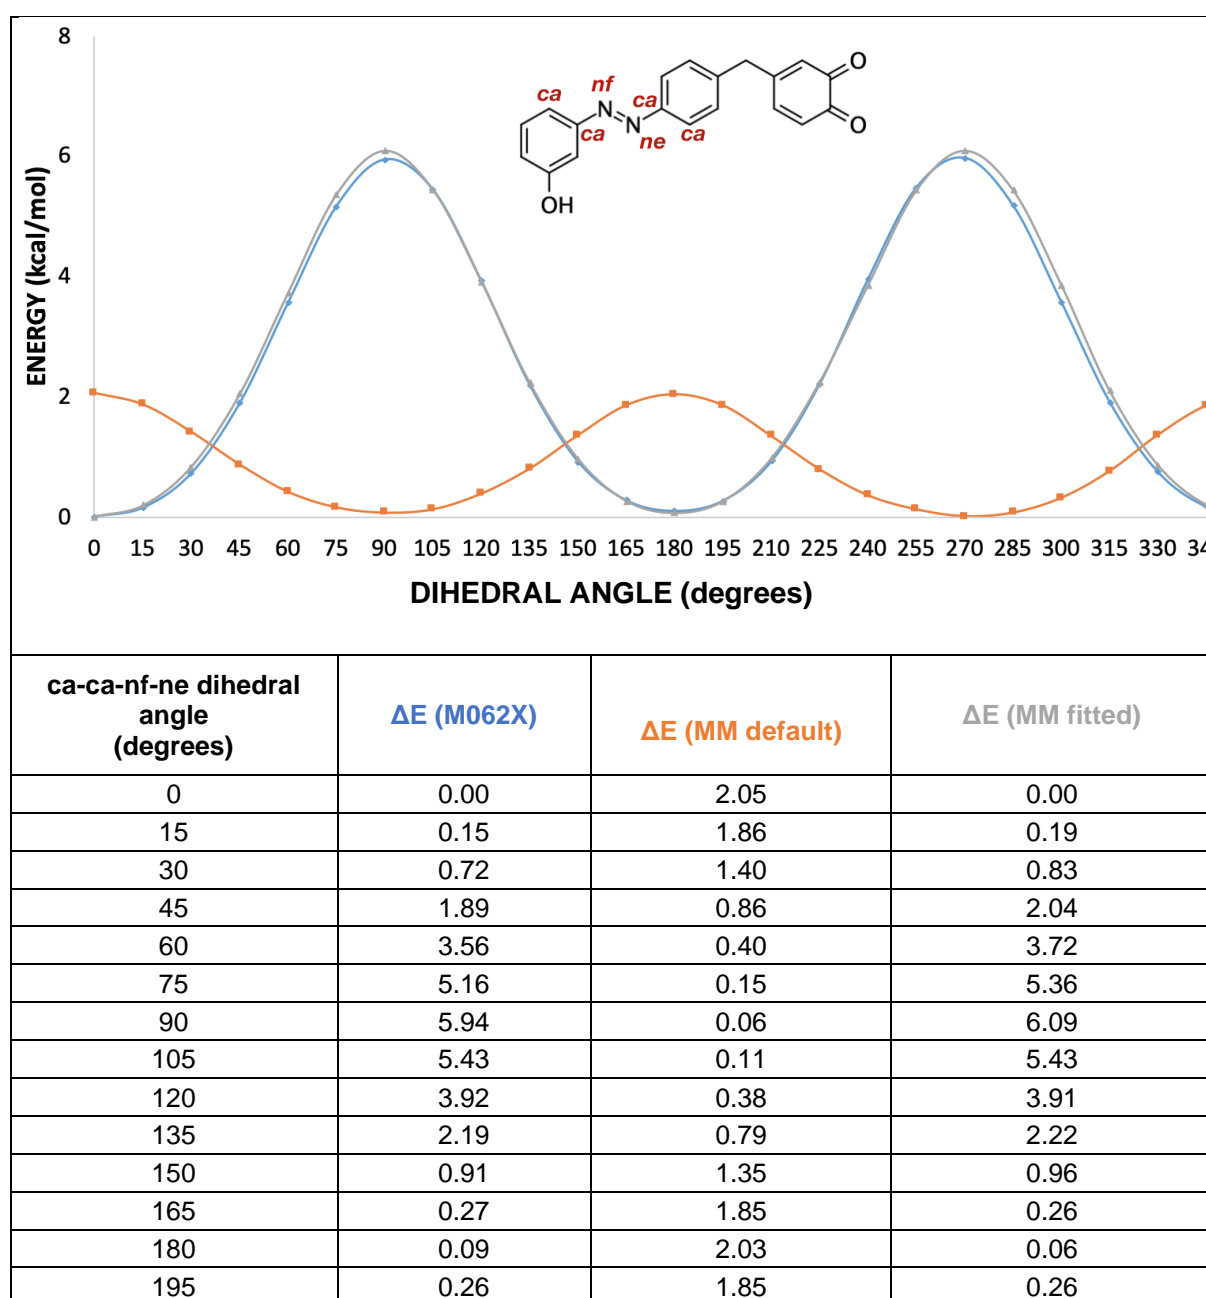

|     |      |      |      |
|-----|------|------|------|
| 210 | 0.92 | 1.33 | 0.97 |
| 225 | 2.21 | 0.78 | 2.24 |
| 240 | 3.95 | 0.35 | 3.85 |
| 255 | 5.47 | 0.11 | 5.43 |
| 270 | 5.97 | 0.00 | 6.09 |
| 285 | 5.17 | 0.06 | 5.43 |
| 300 | 3.57 | 0.31 | 3.85 |
| 315 | 1.90 | 0.75 | 2.09 |
| 330 | 0.74 | 1.36 | 0.85 |
| 345 | 0.16 | 1.84 | 0.20 |
| 360 | 0.00 | 2.03 | 0.02 |

Fitted torsional parameters used in this study for the C-C-N-N torsion:

1. ca-ca-ne-nf 2 4.100 180.000 -2.000  
1. ca-ca-ne-nf 2 0.300 360.000 4.000  
  
2. ca-ca-nf-ne 2 4.100 180.000 -2.000  
2. ca-ca-nf-ne 2 0.300 360.000 4.000

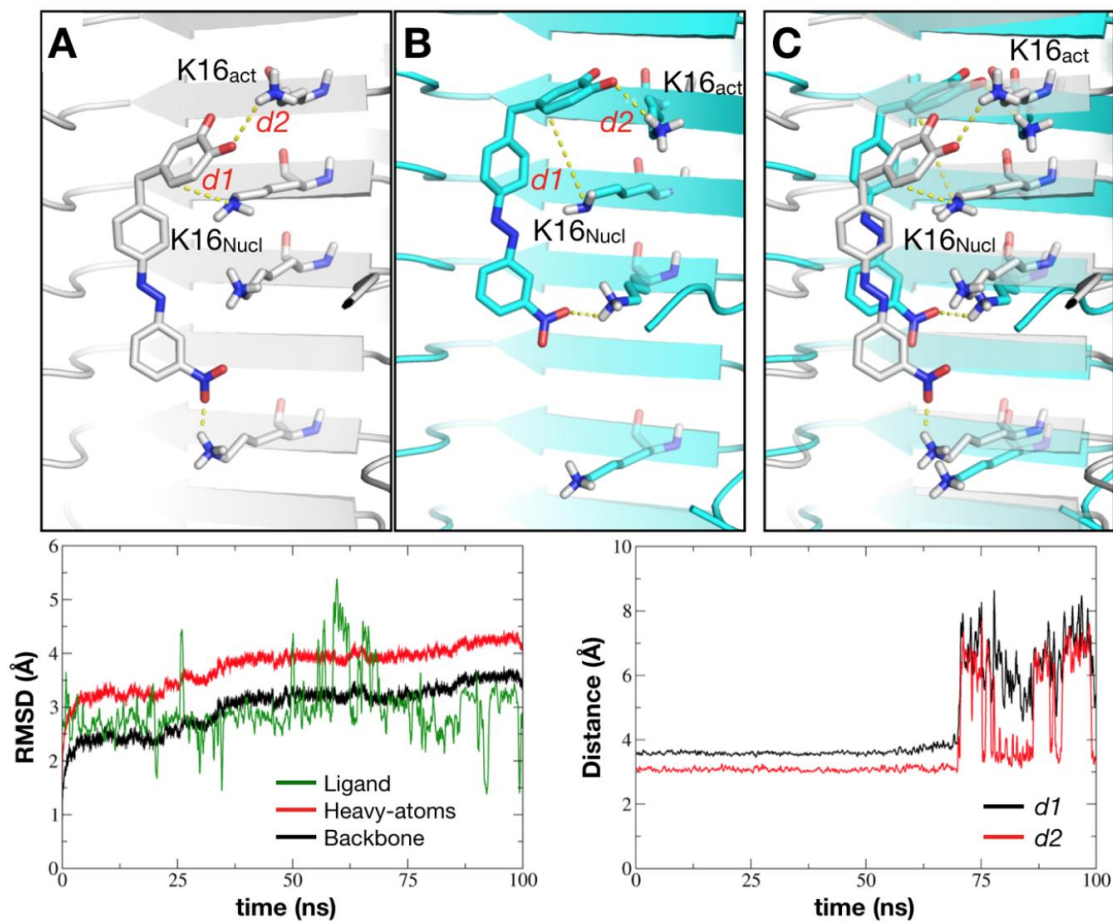

**Figure S1.** Initial (A), final (B) complex and their superposition (C) from one of the three MD simulation of **8c** with Aβ42. RMSD for protein backbone (in black), heavy atoms (in red) and for the ligand (in green) and distance analysis for  $C\beta \cdots NH_2$ -K16<sub>Nucl</sub> (*d1*) and  $C=O \cdots NH_3$ -K16<sub>Act</sub> (*d2*). No data was reported for the other two simulated systems since the ligand left the cavity during the unrestrained MD simulation.

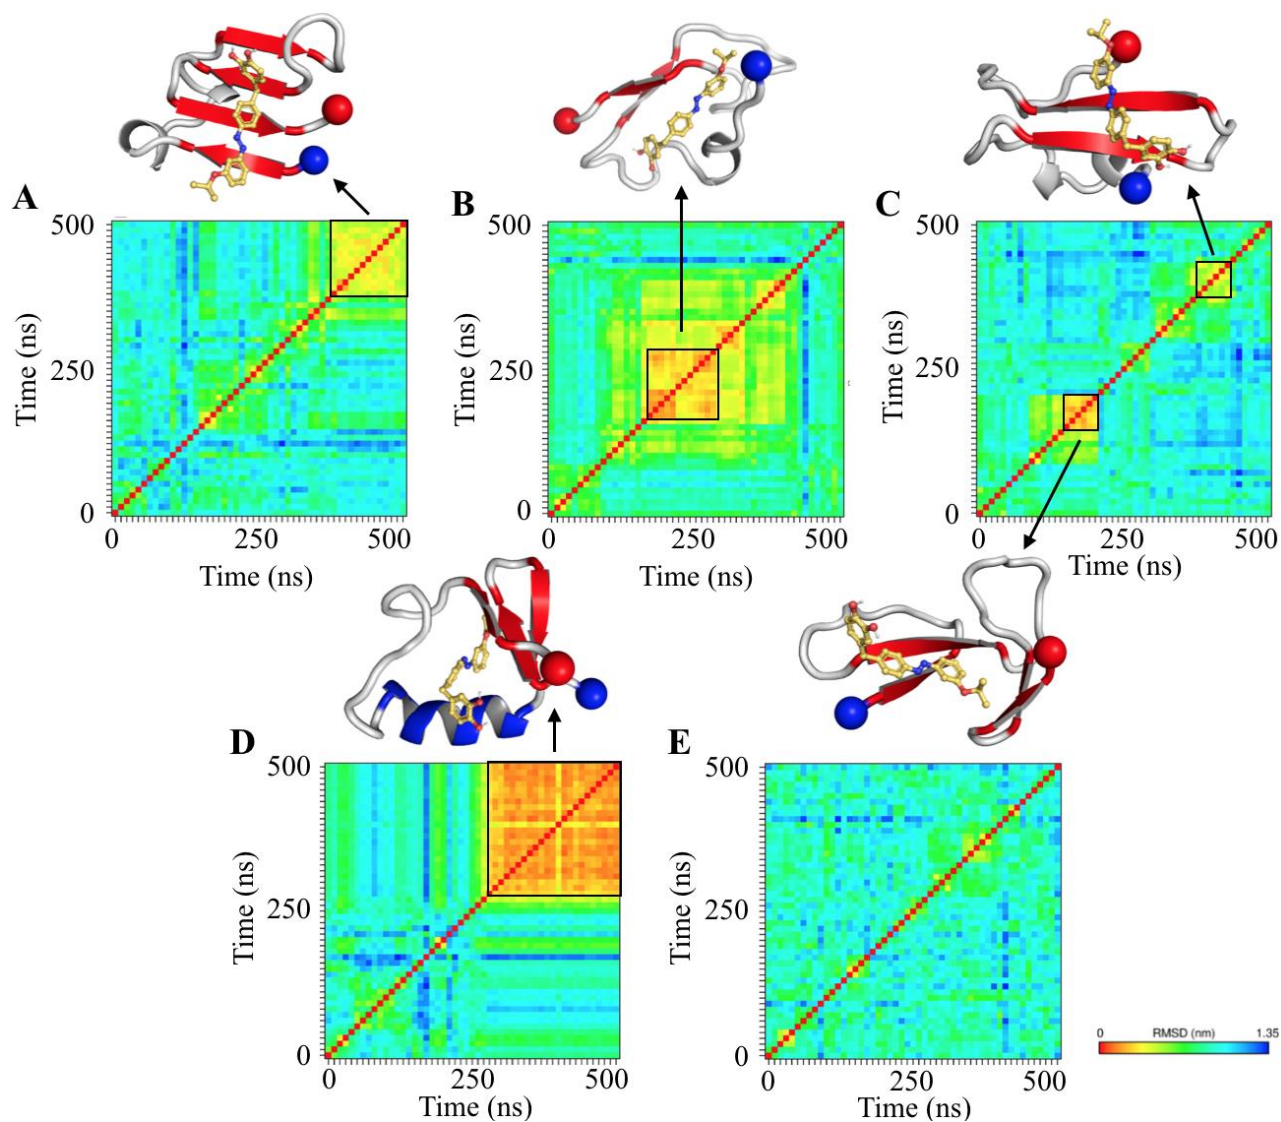

**Figure S2.** 2D-RMS analysis for the first five T-replicas of A $\beta$ <sub>42mon</sub>-8f. representative conformers relative to the most populated clusters are also reported. Colour code for the A $\beta$ <sub>42mon</sub> sequence is set according to the secondary structure analysis shown in **Figure 2** of the main text while 8f is reported as yellow sticks. N- and C-terminal edges of the A $\beta$ <sub>42mon</sub> were reported as blue and red spheres, respectively.

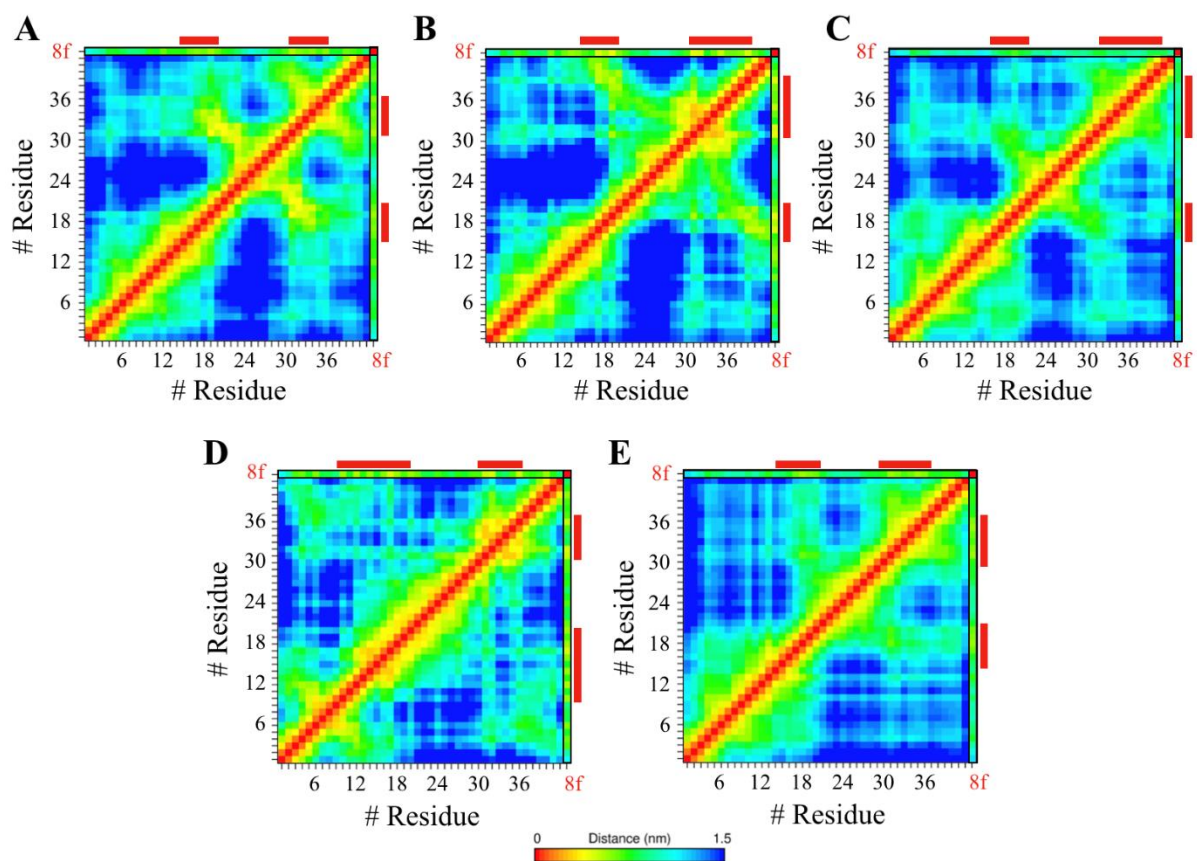

**Figure S3.** Contact map for the five T-replicas of the A $\beta$ 42<sub>mon</sub>-8f complex. Contacts between C $\beta$  atoms of A $\beta$ 42<sub>mon</sub> and compound 8f are marked by red rectangles.

## 2. HPLC-Chromatograms for purity control

(E)-4-(4-(phenyldiazenyl)benzyl)benzene-1,2-diol (**8a**)

<Chromatogram>

mV

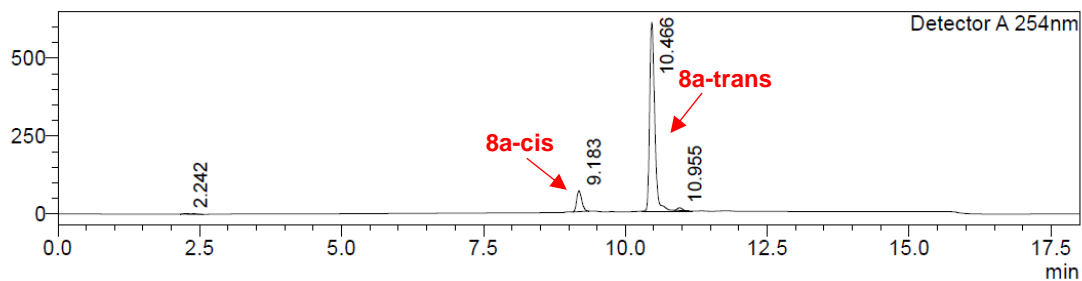

Detector A 254nm

| Peak# | Ret. Time | Area    | Height | Area%   |
|-------|-----------|---------|--------|---------|
| 1     | 2.242     | 23546   | 1450   | 0.546   |
| 2     | 9.183     | 420138  | 66690  | 9.737   |
| 3     | 10.466    | 3822013 | 603335 | 88.580  |
| 4     | 10.955    | 49057   | 8647   | 1.137   |
| Total |           | 4314754 | 680122 | 100.000 |

(E)-4-(4-((3-ethoxyphenyl)diazenyl)benzyl)benzene-1,2-diol (**8b**)

<Chromatogram>

mV

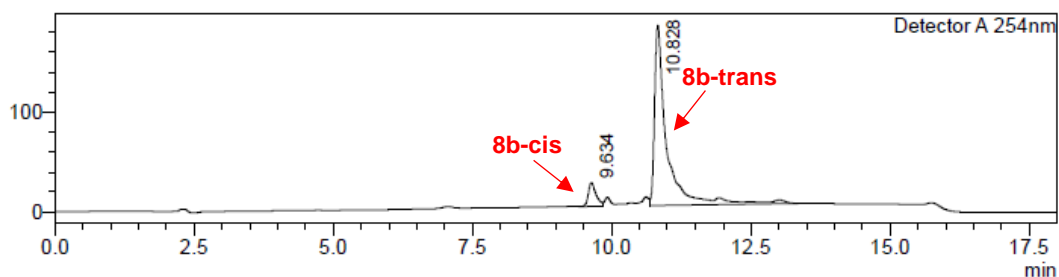

Detector A 254nm

| Peak# | Ret. Time | Area    | Height | Area%   |
|-------|-----------|---------|--------|---------|
| 1     | 9.634     | 228633  | 23643  | 7.728   |
| 2     | 10.828    | 2729853 | 180339 | 92.272  |
| Total |           | 2958487 | 203982 | 100.000 |



(E)-4-(4-((3-nitrophenyl)diazenyl)benzyl)benzene-1,2-diol (**8c**)

<Chromatogram>

mV

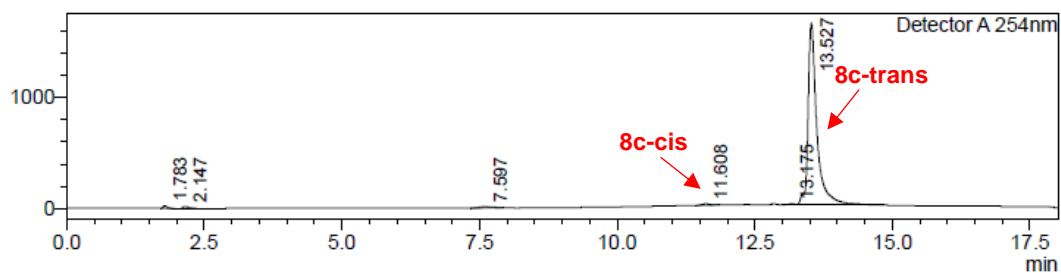

Detector A 254nm

| Peak# | Ret. Time | Area     | Height  | Area%   |
|-------|-----------|----------|---------|---------|
| 1     | 1.783     | 108048   | 23313   | 0.567   |
| 2     | 2.147     | 139768   | 19661   | 0.734   |
| 3     | 7.597     | 194872   | 11746   | 1.023   |
| 4     | 11.608    | 124705   | 12670   | 0.655   |
| 5     | 13.175    | 116605   | 11775   | 0.612   |
| 6     | 13.527    | 18363965 | 1633112 | 96.409  |
| Total |           | 19047961 | 1712277 | 100.000 |

(E)-4-(4-((3-chlorophenyl)diazenyl)benzyl)benzene-1,2-diol (**8d**)

<Chromatogram>

mV

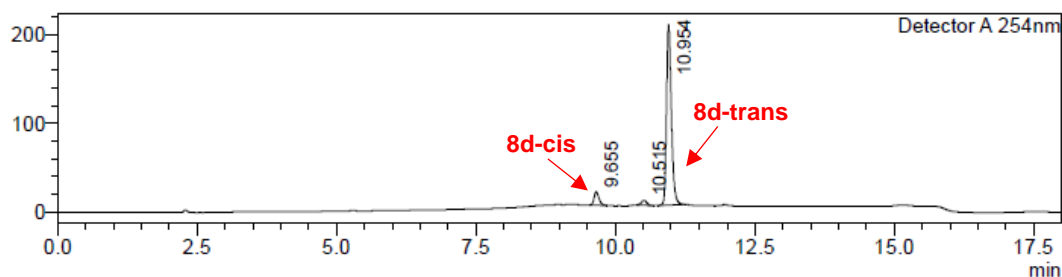

Detector A 254nm

| Peak# | Ret. Time | Area    | Height | Area%   |
|-------|-----------|---------|--------|---------|
| 1     | 9.655     | 91003   | 15057  | 6.737   |
| 2     | 10.515    | 35427   | 5431   | 2.623   |
| 3     | 10.954    | 1224333 | 202168 | 90.640  |
| Total |           | 1350763 | 222657 | 100.000 |

(E)-4-(4-((3-methoxyphenyl)diazenyl)benzyl)benzene-1,2-diol (**8e**)

<Chromatogram>

mV

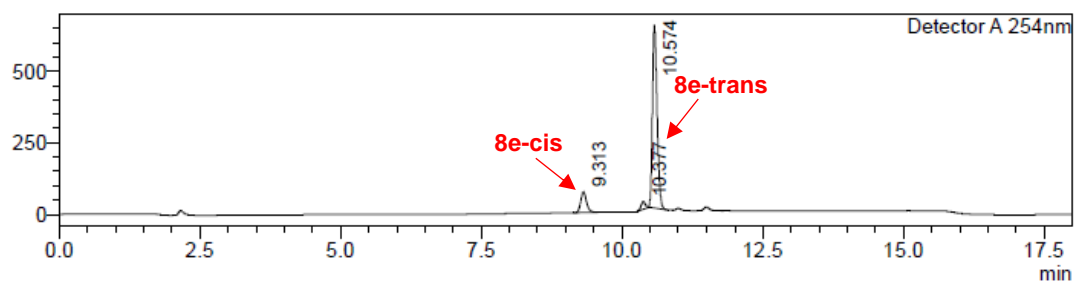

Detector A 254nm

| Peak# | Ret. Time | Area    | Height | Area%   |
|-------|-----------|---------|--------|---------|
| 1     | 9.313     | 524822  | 71424  | 11.939  |
| 2     | 10.377    | 142458  | 26276  | 3.241   |
| 3     | 10.574    | 3728487 | 635583 | 84.820  |
| Total |           | 4395768 | 733282 | 100.000 |

(E)-4-(4-((3-isopropoxyphenyl)diazenyl)benzyl)benzene-1,2-diol (**8f**)

<Chromatogram>

mV

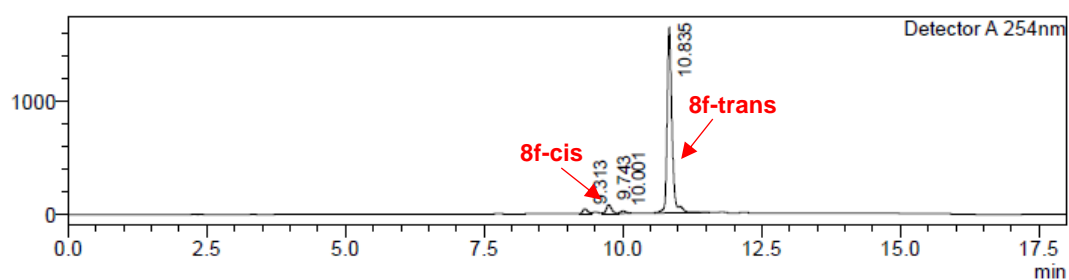

Detector A 254nm

| Peak# | Ret. Time | Area     | Height  | Area%   |
|-------|-----------|----------|---------|---------|
| 1     | 9.313     | 238187   | 41003   | 2.162   |
| 2     | 9.743     | 483583   | 76927   | 4.390   |
| 3     | 10.001    | 132954   | 20649   | 1.207   |
| 4     | 10.835    | 10160992 | 1630878 | 92.241  |
| Total |           | 11015717 | 1769456 | 100.000 |

(E)-1-(4-(3,4-dimethoxybenzyl)phenyl)-2-phenyldiazene (**8g**)

<Chromatogram>

mV

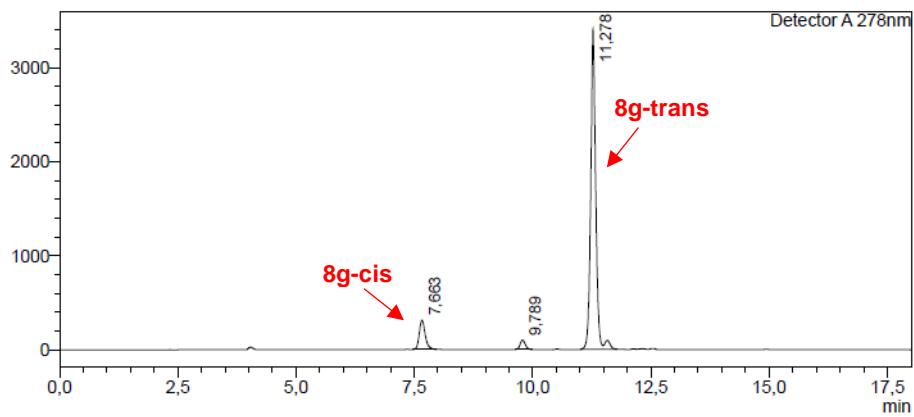

Detector A 278nm

| Peak# | Ret. Time | Area     | Height  | Area%   |
|-------|-----------|----------|---------|---------|
| 1     | 7.663     | 2688643  | 310342  | 9.351   |
| 2     | 9.789     | 738512   | 98967   | 2.569   |
| 3     | 11.278    | 25324315 | 3390073 | 88.080  |
| Total |           | 28751470 | 3799381 | 100.000 |

### 3. Transmission Electron Microscopy

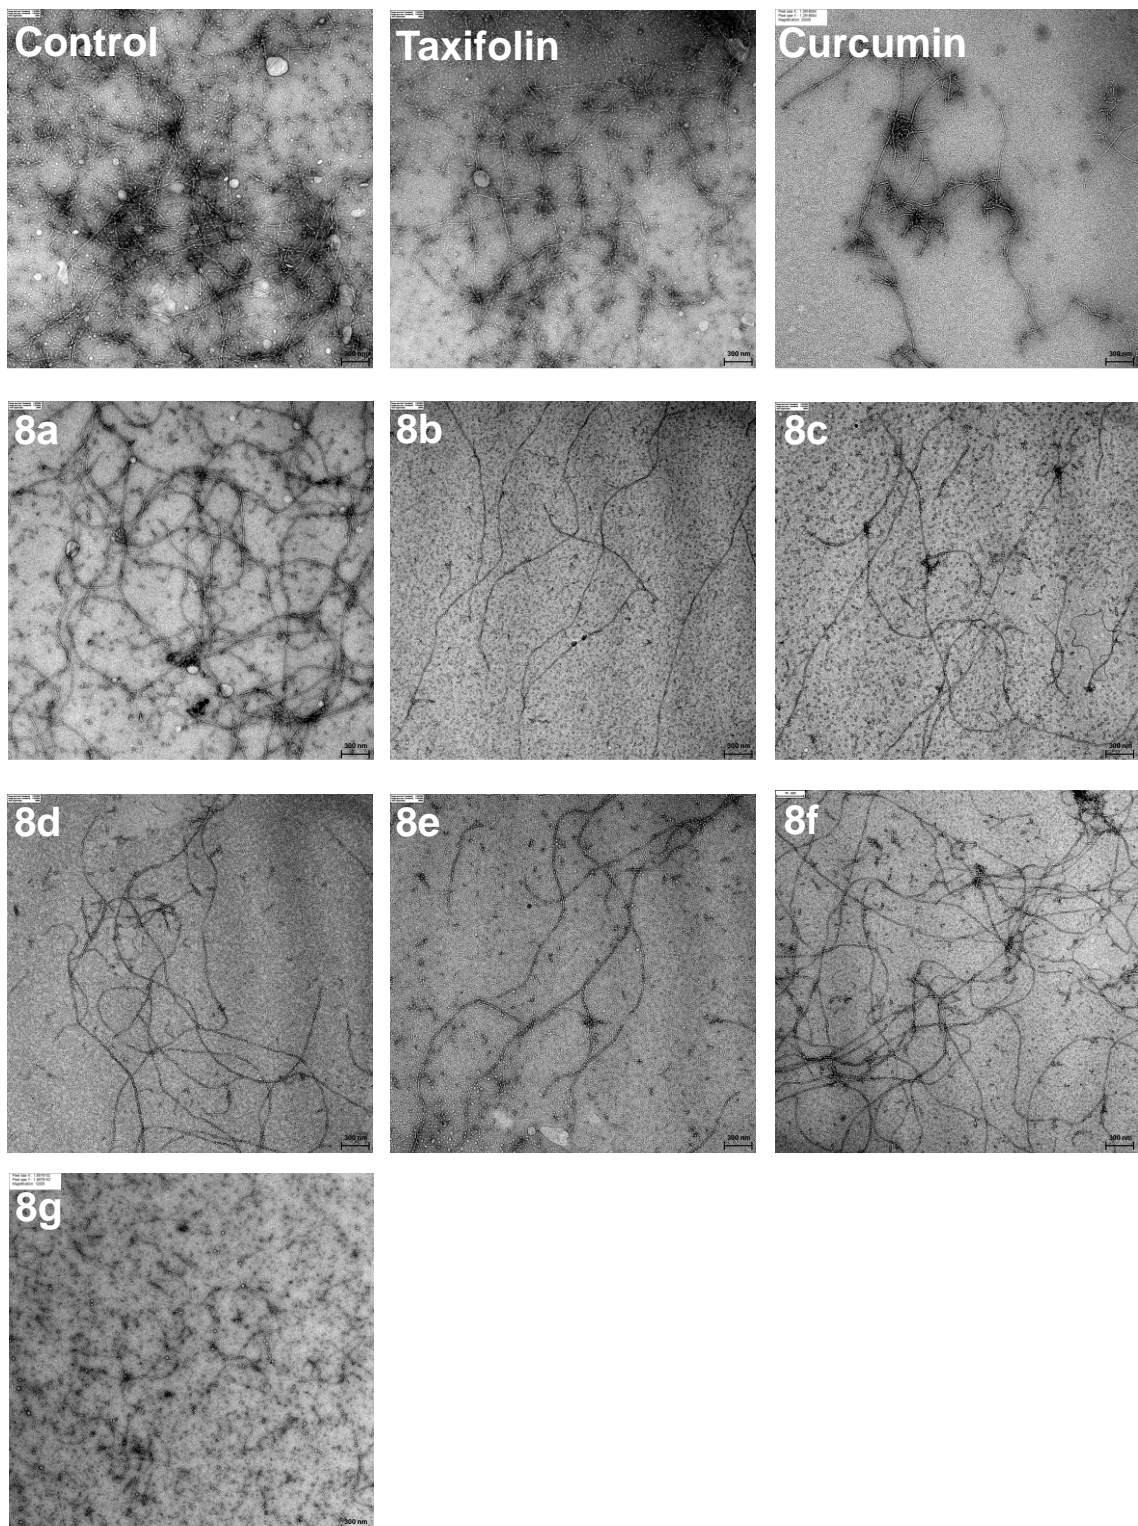

**Figure S4.** TEM analysis of the inhibitory effect on A $\beta$ 42. The A $\beta$  monomer (100  $\mu$ M) was incubated at 37°C in PBS for 24 h with or without 50  $\mu$ M of the respective compound. Scale bar 300 nm.

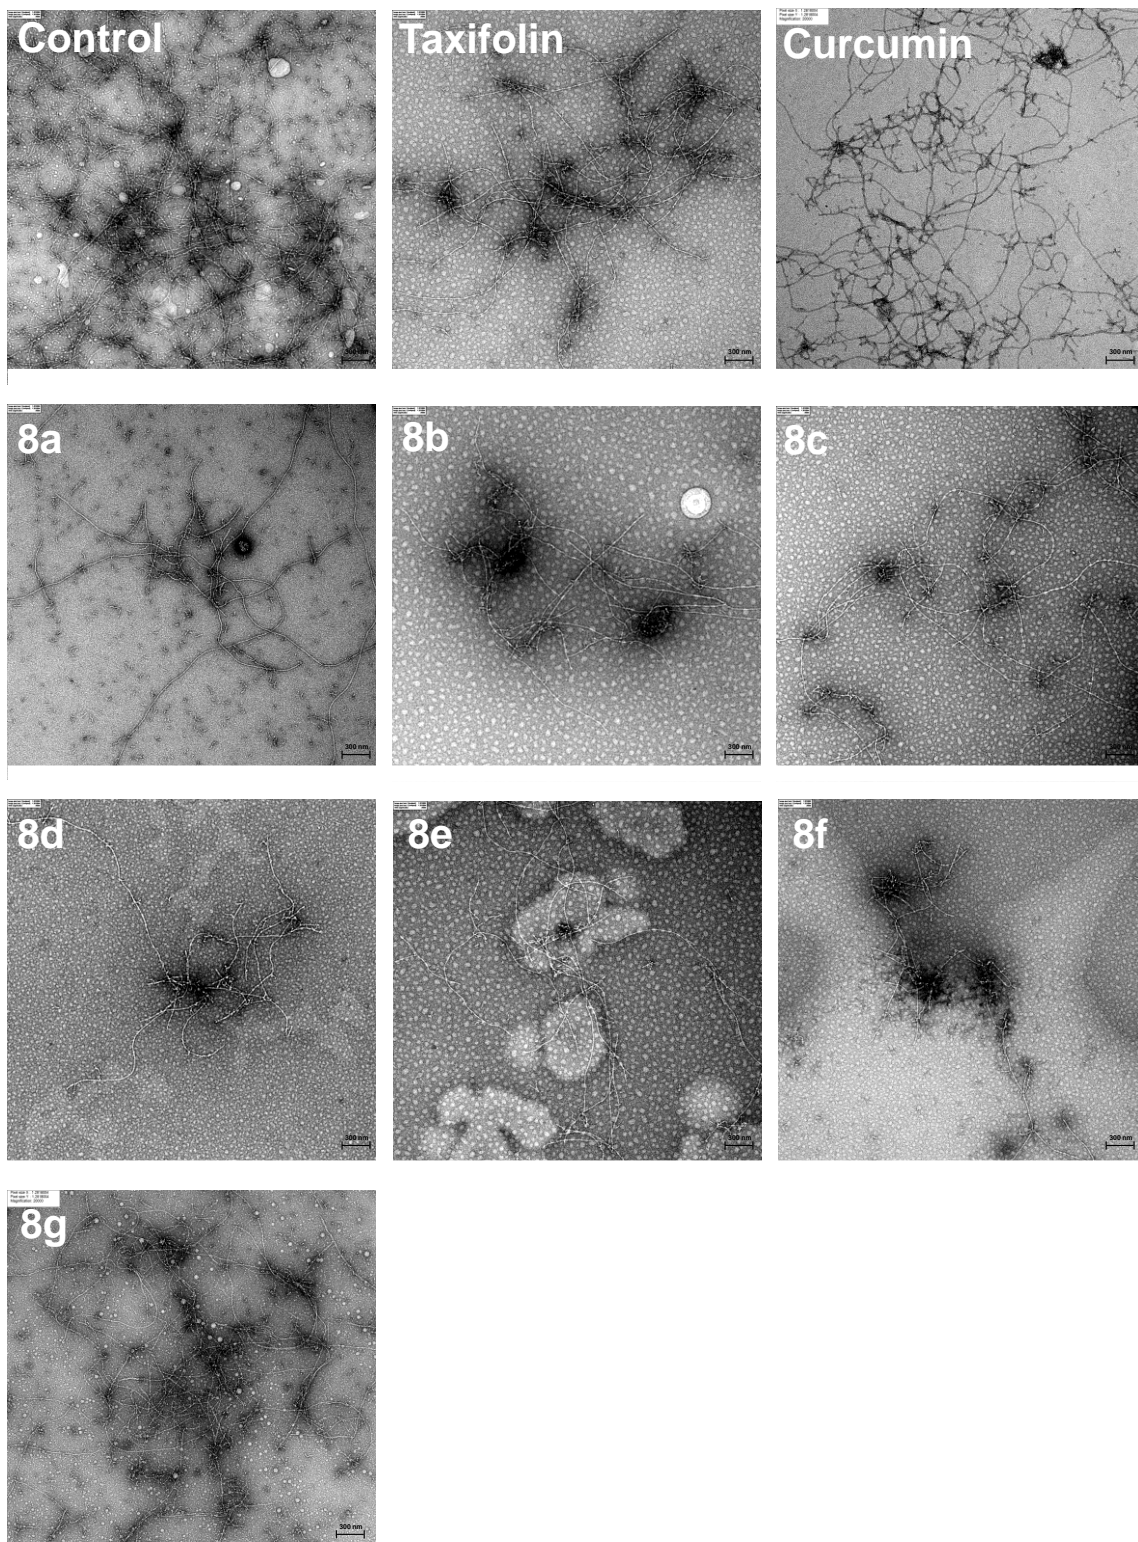

**Figure S5.** TEM analysis of the inhibitory effect on A $\beta$ 42. The A $\beta$  monomer (100  $\mu$ M) was incubated at 37°C in PBS for 24 h with or without 10  $\mu$ M of the respective compound. Scale bar 300 nm.

#### 4. Anti-Inflammatory Effect on BV-2 cells

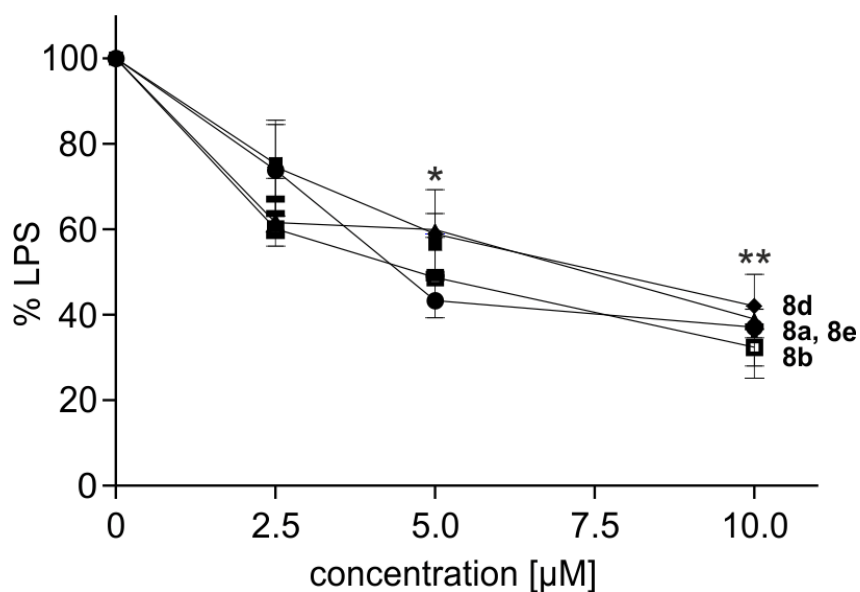

**Figure 6:** Effect of compounds **8a**, **8b**, **8d** and **8e** on the production of NO as inflammation marker. BV-2 cells were treated with 50 ng/mL LPS alone or with the respective compound. NO was determined by the Griess assay in the supernatant. Data is presented as means  $\pm$  SEM of three independent experiments and results refer to LPS treated cells. Statistical analysis was performed using One-Way ANOVA followed by Dunnett's multiple comparison posttest using GraphPad Prism 5. Level of significance: \*\*  $p < 0.01$ , \*  $p < 0.05$ .
